1                    **Detection of sexually antagonistic transmission distortions in trio datasets**

2  
3            Elise A. Lucotte<sup>1,2,3</sup>, Clara Albiñana<sup>1,4</sup>, Romain Laurent<sup>2</sup>, Claude Bhérer<sup>5</sup>, Genome of the Netherland  
4 Consortium\*\*, Thomas Bataillon<sup>1\*</sup>, Bruno Toupance<sup>2\*</sup>

5            <sup>1</sup> Bioinformatic Research Center, Aarhus University, 8000, Denmark

6            <sup>2</sup> Unité Eco-anthropologie (EA), Muséum national d'histoire naturelle, CNRS, Université de Paris, 17  
7 place du Trocadéro 75016 Paris, France

8            <sup>3</sup> Cancer Epidemiology: Gene and Environment INSERM U1018

9            <sup>4</sup> National Centre for Register-based Research, Department of Economics and Business Economics,  
10 Aarhus BSS, Aarhus University, Aarhus, Denmark

11            <sup>5</sup> Department of Human Genetics, Faculty of Medicine, McGill University

12            \* The authors contributed equally

13            \*\*The complete list of authors of the Genome of the Netherland Consortium are listed in the  
14 supplementary materials.

15  
16            **Corresponding author:** Elise A. Lucotte, [elucotte@gmail.com](mailto:elucotte@gmail.com)

17  
18            **Keywords:** Sexually antagonistic selection, transmission distortion, sex dimorphisms, intralocus  
19 sexual conflict, human population genetics

21

22

## ABSTRACT

23

24

25

26

27

28

29

30

31

32

33

34

Sex dimorphisms are widespread in animals and plants, for morphological as well as physiological traits. Understanding the genetic basis of sex dimorphism and its evolution is crucial for understanding biological differences between the sexes. Genetic variants with sex-antagonistic effects on fitness are expected to segregate in populations at the early phases of sexual dimorphism emergence. Detecting such variants is notoriously difficult, and the few genome-scan methods employed so far have limited power and little specificity. Here, we propose a new framework to detect a signature of sexually antagonistic selection. We rely on trio datasets where sex-biased transmission distortions can be directly tracked from parents to offspring, and allows identifying signal of sexually antagonistic transmission distortions in genomic regions. We report the genomic location and recombination pattern surrounding 66 regions detected as potentially under sexually antagonist selection. We find an enrichment of genes associated with embryonic development within these regions. Last, we highlight two candidates regions for sexually antagonistic selection in humans.

35

36

37

38

## INTRODUCTION

Males and females primarily differ by the size and number of their gametes, and this asymmetry generates fundamental differences in how fitness is gained in each sex (Parker *et al.* 1972). As a result, a sexual conflict, *i.e.* when selection on a trait acts in opposite direction between the sexes may arise. Genetic variants conferring modifications of a phenotypic trait may be favored in females but disfavored in males and *vice-versa*. These traits are said to be under Sexually Antagonistic (SA) selection. SA genetic variations encoded by the same sets of genes in both sexes lead to an Intralocus Sexual Conflict (IASC). The resolution of IASCs, notably via the evolution of sex-biased expression, is believed to be the primary mechanism for the emergence of sexual dimorphism (Parsch and Ellegren 2013).

Although IASCs have been extensively studied, both theoretically and empirically, many fundamental questions remain unanswered (Mank 2017). In particular, the genomic architecture of these conflicts, *i.e.* their genomic signature, localization and effect on genetic diversity, is subject to debate. Theory predicts that unresolved IASCs influencing survival can lead to a stable polymorphism at SA loci (Rice 1984). It is also expected that female-advantageous alleles are more frequently found in females than in males and *vice-versa* for male-advantageous alleles. However, a substantial difference in allelic frequency between the sexes can only occur if a large number of spontaneous abortion or selective death happen in the population. In humans, while it is unlikely that such selection takes place after birth as mortality during infancy is low in Westernized populations ([esa.un.org](http://esa.un.org)), strong selection can potentially occur before birth. Indeed, the survival probability of an embryo is estimated to be less than 50% in humans (Benagiano *et al.* 2010) and differences in allelic frequencies between the sexes have been observed among human newborns (Ucisik-Akkaya *et al.* 2010), suggesting that substantial amounts of sex-biased selection may occur before birth.

Previous studies have relied on intersexual  $F_{ST}$  to detect ongoing IASC on survival (Cheng and Kirkpatrick 2016; Lucotte *et al.* 2016; Flanagan and Jones 2017; Wright *et al.* 2018), but recent studies argue that this index has limitations. Indeed, high intersexual  $F_{ST}$  can be observed in the absence of IASC if selection is limited to one sex or acts with different strengths in each sex. Moreover, it has low power because differences in allelic frequencies between the sexes are expected to be small and a high selection coefficient is needed for them to be detectable (Chippindale *et al.* 2001; Kasimatis *et al.* 2017, 2019).

Theory predicts that the maintenance of polymorphism at a SA locus is facilitated if linked to a distorter locus (Úbeda and Haig 2005; Patten 2014), which would lead to a transmission distortion (TD, *i.e.* non Mendelian transmission of alleles to offspring) occurring before birth either at gamete production (meiotic drive), after copulation (gametic selection) or at fertilization (cryptic choice of the sperm by the ovule). Hence, haplotypes undergoing TD are expected to be enriched for loci with sex-specific effects (Burt and Trivers 2006). Therefore, a locus undergoing IASC is likely to be transmitted in a sex-biased way: parents would transmit more often one allele to their sons and another allele to their daughter either *via* selection on survival during embryonic development or *via* sex-biased TD.

In this study, we propose a new approach to detect signature of IASC based on tracking the transmission patterns of alleles from parents to offspring. We rely on trio datasets and focus on sex-biased TD in offspring. Our method models explicitly the strength and direction of TD and whether it acts in a sex-specific manner, allowing to distinguish different types of sex-biased TD: i) sex-antagonistic: one allele is preferentially transmitted to one sex and the other allele is preferentially transmitted to the other sex,

81 ii) sex-differential: the same allele is preferentially transmitted with different intensities to both sexes and  
82 iii) sex-limited: one of the sex is under TD.

83 We first describe our method. Second, we apply it on the Genome of the Netherlands (GoNL)  
84 dataset, which comprises 250 human trios sequenced at 13X coverage (The Genome of the Netherlands  
85 Consortium 2014), and explore how widespread IASCs acting on survival are in the human genome. Third,  
86 we highlight two candidate regions undergoing sex-antagonistic TD.

## 87 88 **MATERIAL AND METHOD**

### 89 **Dataset and filtering**

90 The Genome of the Netherlands dataset (The Genome of the Netherlands Consortium 2014)  
91 comprises 250 parents-child trios (98 Sons and 150 daughters) sequenced at a median coverage of 13X.

92 We first verified the sex labels by looking at the percentage of X chromosome heterozygosity in  
93 males (under 2%) and females (over 6%). For two couples of parents, the males were mislabelled females  
94 and *vice-versa* (n°78 and 244).

95 Only bi-allelic SNPs that passed the quality control of GoNL were retained (Boomsma *et al.* 2014;  
96 The Genome of the Netherlands Consortium 2014). The pseudo-autosomal regions on the X chromosome  
97 were removed (hg19 positions, chrX:60001-2699520 and chrX:154931044-155260560). X-linked SNPs  
98 presenting at least one heterozygous male were removed. Because of the trio structure of the dataset,  
99 we were able to test for Mendelian errors, and therefore marked the genotype as missing data for further  
100 analyses. Furthermore, SNPs with 2 or more Mendelian errors were removed. At this stage, the dataset  
101 comprised 16,980,626 SNPs genome-wide. We removed SNPs with less than 150 informative trios (*i.e.*  
102 when at least one parent is heterozygous), for autosomal loci, and 75 informative trios (*i.e.* when the  
103 mother is heterozygous) for X-linked loci. In the final dataset, 1,709,245 autosomal SNPs and 50,204 X-  
104 linked SNPs were kept.

105 We verified that the dataset was not genetically structured by sex. We calculated genetic distance  
106 matrices in parents for the autosomes and the X chromosome, independently. In this analysis, SNPs in  
107 linkage-disequilibrium ( $r^2 > 0.25$ ) and individuals with more than 0.5% of missing data were removed. For  
108 autosomes, 1 million SNPs were randomly picked 10 times independently and all SNPs were included for  
109 the X chromosome. One X chromosome at random was kept for females, and this operation was iterated  
110 30 times independently. Distance matrices between all individuals were calculated using the allele-sharing  
111 distance (ASD) and Multi-Dimensional Scaling (MDS) were constructed from those matrices. To determine  
112 if male-female distances were significantly different than zero, we performed a Mantel test on the  
113 distance matrix between males and females and a matrix where distances between males and females  
114 were equal to one and distances between individuals with the same sex were equal to zero. For each  
115 repetition, the correlation between both matrices was never significant, either for the autosomes or the  
116 X chromosome (Figure S6).

117 The small difference in age when sampled between males and females should not have an impact  
118 on our results for both in parents (median of 61 years in females and 63 years in males) and in children  
119 (median of 35 years in females and 34 in males) (Figure S7).

### 120 121 **The likelihood method**

122 We developed a maximum likelihood framework tailored specifically to analyze the transmission of  
123 alleles in a set of parents-offspring trios. In our framework, all trios are assumed to be independent

(genetically unrelated) and, for a given variant, we only exploit the information brought by informative trios (see Figure 1). We also consider one polymorphic position at a time, although extensions to model the transmission of haplotypes could also be in principle developed.

Within each trio, the transmission of an allele from parents to offspring is modeled using 3 transmission models ( $M_0$ ,  $M_1$  and  $M_2$  see Figure S1A) that make different assumptions on the effect size and type of transmission distortion affecting a SNP.

At each variable position where at least 150 informative trios are available (75 for the X chromosome), the (natural log) likelihood of the data ( $\ln L$ ) under each model is calculated as a series of binomial or multinomial probabilities (see supplementary information for the explicit formulation of the likelihood under each model). The likelihood functions under each transmission model  $M_i$  are maximized analytically thereby yielding (maximum likelihood) estimates for the  $\epsilon$ 's as well as measures of statistical uncertainty around the  $\epsilon$  estimates (95% approximate confidence interval from likelihood profiles). Last, likelihood ratio tests (LRTs), calculated as differences in deviance between models are used to quantify the amount of statistical support for each alternative model. Note that all three models are nested ( $M_0$ ,  $M_1$  and  $M_2$ ) and accordingly the  $p$ -values associated with each likelihood ratio test statistic was calculated assuming a  $\chi^2$  probability distribution with degrees of freedom calculated as the number of fitted (free) parameters by which the fitted model differ: the LRT between  $M_1$  and  $M_0$  is matched against a  $\chi^2$  distribution with 1 df, while  $M_2$  versus  $M_0$  is using a  $\chi^2$  distribution with 2 df.

A local score correction method was used on the  $p$ -value of the likelihood of  $M_2$  vs  $M_0$  to correct for multiple testing (Fariello *et al.* 2017). We used the code made available as a supplementary to this publication. The local scores were computed using the recommended default setting (aggregating  $p$ -values  $p < 0.1$  yielding a score of 1 or higher).

### Classification into SA, SL and SD TD

Each SNP with a significant  $p$ -value of the LRT  $M_2$  vs  $M_0$  and located in a region enriched in low  $p$ -value detected with the Local Score method was classified into SA, SL or SD TD. The decision rule was based on the value of  $|\epsilon_m + \epsilon_f|$ , for a threshold  $t$  of 0.05, which corresponds to the standard deviation of the distribution of epsilons genome-wide.

A SNP is classified as:

- SA if  $|\epsilon_m + \epsilon_f| \leq \text{maximum}(|\epsilon_m|, |\epsilon_f|) + t$
- SL if  $|\epsilon_m + \epsilon_f| = \text{maximum}(|\epsilon_m|, |\epsilon_f|) \pm t$
- SD if  $|\epsilon_m + \epsilon_f| \geq \text{maximum}(|\epsilon_m|, |\epsilon_f|) - t$

Then, for each regions detected using the Local Score method, if at least 75% of the SNPs could be classified into one category, the region was labelled as this category, otherwise the region was labelled "mixed".

### Recombination quantile, intersexual $F_{ST}$ and enrichment analysis in candidate regions

To investigate the relationship between presence of sex-specific TD and recombination rate, we downloaded recombination maps from the HapMap phase II project (Frazer *et al.* 2007). We computed the average recombination rate for every autosomal region exhibiting a signal of sex-specific TD. Then, we divided the genome in non-overlapping windows matching the lengths distribution of sex-specific TD regions, and computed the average recombination rate for these windows as a null distribution of

166 genome-wide recombination rates. We used binomial tests to ascertain whether the distribution of  
167 recombination rates in sex-specific TD regions matched the null genomic distribution.

168 For each region type (SA, SL and SD), the intersexual  $F_{ST}$  was calculated SNP-wise using the Weir and  
169 Cockerham estimator (Weir and Cockerham 1984) and a genome-wide distribution of  $F_{ST}$  was computed.  
170 Then, we produced empirical null distributions for intersexual  $F_{ST}$  by matching an equal number of random  
171 genomic regions with comparable heterozygosity and number of SNPs.

172 We used the refseq genes coordinates from built hg19 to determine which genes were located in  
173 the candidate regions. EnrichR was used to perform the functional enrichment analysis, and the tissue-  
174 expression enrichment analysis (Chen *et al.* 2013; Kuleshov *et al.* 2016).

### 176 Pipeline for analysing the candidate regions

177 First, we phased the region using shapeit2 (O'Connell *et al.* 2014). A genetic distance matrix was  
178 calculated between all individuals, and a MDS was constructed. Haplotype were identified using a density-  
179 based clustering algorithm (package FPC, function dbscan, (Hennig 2019)). Then, we determined the  
180 detailed haplotype transmission pattern and assessed significance for sex-specific TD using a Binomial test  
181 where  $H_0$  is that the probability of transmission does not depend on offspring sex. Third, we analysed the  
182 sequence divergence between haplotypes.

183 To investigate the recombination landscape in TD regions, we used published sex-specific genetic  
184 maps (Bherer *et al.* 2017). These maps were built using recombination data from 6 main sources. In total,  
185 the combined recombination dataset comprised over 3 million recombination events inferred using  
186 genome-wide genotyping data in families and pertaining to over 100,000 meioses. Due to sample  
187 ascertainment in the original studies, the female, male and sex-averaged recombination maps are mainly  
188 representative of Europeans.

## 190 RESULTS

### 191 A framework for detecting sex specific transmission distortions

192 We developed a likelihood-based framework to detect sex-biased TD in offspring using trio  
193 sequencing (or genotyping) datasets. This method is applied throughout the genome at informative  
194 biallelic SNP, *i.e.* SNP with at least one heterozygous parent, examines the fit of the data to three  
195 alternative models for the transmission of SNPs from parent to offspring (Figure 1A). All models  
196 incorporate a distortion parameter ( $\epsilon$ ) that measures the strength and direction of the transmission  
197 distortion acting on the alternative allele at a given SNP:  $\epsilon$  is zero under Mendelian transmission (model  
198  $M_0$ ), different from zero but identical in both sexes under classical TD (model  $M_1$ ), and  $\epsilon$  is expected to  
199 have sex-specific values ( $\epsilon_m$  for male offspring and  $\epsilon_f$  for female offspring) in case of sex-specific TD (Model  
200  $M_2$ ). A likelihood ratio test (LRT) is performed between  $M_0$  and  $M_2$  to detect specifically loci under sex-  
201 biased TD.

202 The sex-specific  $\epsilon$  parameter estimates are then used to classify a SNPs exhibiting a sex-biased TD  
203 signal into sex-antagonistic (SA, *i.e.* TD in both sexes and in opposite direction), sex-limited (SL, *i.e.* TD in  
204 only one sex) and sex-differential (SD, *i.e.* TD in both sexes and in the same direction but with different  
205 strength) (see methods and Figure 1B). Genomic regions with 75% or more SNPs with one type of TD  
206 signal were categorized as such, and those that could not be classified were labelled "mixed" regions.

207 By modeling explicitly sex-biased TD, we rely on a more specific signal than mere intersexual  $F_{ST}$  to  
208 track IASCs because we only consider the sub-sample of informative trios (where at least one parent is

209 heterozygote) to evaluate the direction of transmission. Moreover, this method allows to distinguish  
210 between SA, SL and SD TD confidently, which is impossible with intersexual  $F_{ST}$  because SL and SD selection  
211 also leads to higher intersexual  $F_{ST}$ , nor with the classical Transmission Disequilibrium Test to discover TD  
212 (Spielman *et al.* 1993).

213 We first performed power analyses on simulated trio data to evaluate the ability of our method to  
214 detect SNPs that undergo sex-biased TD (Figure 1C-D). We performed two types of simulations, one with  
215 equal transmission to male and female offspring and one with sex-specific distortion parameters, each  
216 types with 500 repetitions. We varied the number of informative trios available, the difference between  
217  $\epsilon_m$  and  $\epsilon_f$  from 0 to 0.4 ( $|\epsilon_m - \epsilon_f|$ , Figure 1C) and the magnitude of the  $\epsilon$  affecting a SNP from 0 to 0.2  
218 (Figure 1D). The power corresponds to the proportion of significant p-values across repetitions  
219 ( $\alpha=5\%$ ). As expected, the power increases with the sample size and the effect size. For sex-  
220 antagonistic TD, we show that for a sample of 150 informative trios, which is our cutoff, the power is 0.6  
221 for  $|\epsilon_m - \epsilon_f|=0.2$ , 0.8 for  $|\epsilon_m - \epsilon_f|=0.25$  and 0.95 for  $|\epsilon_m - \epsilon_f|=0.3$  (Figure 1C). Moreover, for 150  
222 informative trios, we have a power of 0.75 to detect an epsilon of 0.1, of 0.9 for an epsilon of 0.15 and 1  
223 for an epsilon of 0.2 (Figure 1D). The cutoff chosen in this study of 150 informative trios provides sufficient  
224 power to detect sex-biased TD within the sample size of the GoNL trio dataset. Therefore, the power to  
225 detect SA is strongly influenced by the sample size of the trio dataset (Figure 1).

226 The  $LRT(M_0-M_2)$  p-values we obtained for individual SNPs can be analyzed further using method  
227 controlling false discovery rate or a local score method (Fariello *et al.* 2017). By doing the latter, we focus  
228 on regions enriched in low p-values, mitigating the common issue of the ‘winner’s curse’ in genome-scan  
229 approaches and accounting for the fact that several loci that are physically close to a target of TD share  
230 the same signal due to linkage disequilibrium.

231 Our method can be used for both NGS and array-based genotyping datasets, keeping in mind that  
232 regions poorly represented in a SNP genotyping chip will be less likely to be considered significant by the  
233 local score method. Below we illustrate our method by applying it to the sequencing GoNL trios dataset  
234 (The Genome of the Netherlands Consortium 2014).

### 235 236 **Genomic distribution of sex-biased TD**

237 We analyzed 248 trios from GoNL sequenced at a median coverage of 13X. After filtering for  
238 informative trios, we screened a total of 1,709,245 SNPs on autosomes and 50,204 X-linked SNP. Instead  
239 of doing a correction for multiple testing, we applied the Local Score method to detect region that are  
240 enriched in low p-values. We used a threshold of  $\alpha=1$ , which considers p-values lower than 0.1. We  
241 detected 66 SA candidate regions in the GoNL data, including 32 containing genes. Moreover, we detected  
242 168 SL regions, 68 SD regions and 230 mixed regions (Figure 2A, Table 1, Figure S1, Table S1).

243  
244 We examined the robustness of our findings. First, if we use a more stringent cutoff to aggregate  
245 local score (*i.e.*  $\alpha=2$ ), we find 38 regions: 11 SA, 12 SD, 7 SL and 8 mixed regions (Table S1). As an  
246 alternative, we computed an estimate of the proportion of regions that are coming from Model  $M_0$  that  
247 posits “no transmission bias” (proportion  $\pi_0$ ) *versus* the proportion of region exhibiting some form of  
248 distortion ( $1-\pi_0$ ). To do so, we first conservatively thinned out SNPs, keeping only SNPs that are 500kb  
249 apart to minimize correlation among p-values ( $n=5272$ ). We obtain a very uniform empirical distribution  
250 of p-values across these SNPs, as expected if our LRT is well calibrated and most tests in thinned SNPs are  
251 anchored in regions coming from  $M_0$  (Figure S2). Using the empirical distribution of thinned p-values, a

252 false discovery rate approach (q-value) estimates that, depending on the cut-off used to estimate  $\pi_0$ ,  $\pi_0$   
253 is 0.98-0.99. This is suggesting that 1-  $\pi_0 \approx 1$ -2% of the SNPs are anchored in regions that harbour a signal  
254 of transmission distortion. This corresponds to roughly 50-10 regions departing from  $M_0$ . Note however  
255 that when assuming a strict FDR approach only one SNP yields a signal that is strong enough to have local  
256 FDR < 0.01. This illustrates that more trios are needed to get more precision on the  $\pi_0$  estimate (as more  
257 data will generate clearer separation in the distribution of p-values on SNPs coming from either  $M_0$  or  
258 alternative SA models such as  $M_2$ ).

259 The epsilon values for SNPs classified as SA, SD and SL are displayed on Figure 2B for chromosome  
260 1 as an example. Figure 2C shows the mean absolute values of  $\epsilon_m$  and  $\epsilon_f$  for the regions detected as  
261 enriched in low p-values using the local score method.

262 Finally, we investigated the distribution of TD regions with respect to recombination. SA, SL and SD  
263 regions are significantly under-represented in the high recombination quantile of the genome (Figure 2B  
264 SD p-value= $4.41 \times 10^{-3}$ , SL p-value= $3.23 \times 10^{-9}$ , SA p-value= $2.27 \times 10^{-3}$ ), however this could be due to the Local  
265 Score method used to detect regions enriched in low p-values. Indeed, a high recombination rate implies  
266 a low LD, which in turns leads to less power to detect significant regions using the Local Score method. SL  
267 regions are significantly over-represented in region of medium-low recombination (quantile 2, ]0.27, 0.77  
268 cM/Mb], p-value= $9.56 \times 10^{-7}$ ).

269

### 270 **Intersexual $F_{ST}$ distributions for the three types of regions**

271 For each set of SA, SL or SD regions, we computed the distribution of intersexual  $F_{ST}$  in offspring,  
272 and compared it to a matched empirical null distribution of intersexual  $F_{ST}$ . For each type of TD regions,  
273 this null distribution was obtained by randomly sampling genomic regions with matching nucleotide  
274 diversity, length and number of SNPs (Figure S3). SA, SL and SD regions show high values of intersexual  
275  $F_{ST}$ , as compared to matched random genomic regions. Among TD regions, the values for SA regions are  
276 significantly higher than both SL and SD (Wilcoxon-Mann-Whitney test, p-values <  $2 \times 10^{-16}$ ). Indeed, for SA,  
277 SD and SL regions, the means for the intersexual  $F_{ST}$  values in offspring are 0.012 (sd=0.011), 0.000  
278 (sd=0.004) and 0.005 (sd=0.009), respectively. This result is consistent with the expectation that  
279 intersexual  $F_{ST}$  should be high in regions harboring signals of IASC on survival and that high values can also  
280 be detected in case of SL and SD selection (Mank 2017; Wright *et al.* 2018).

281

### 282 **Enrichment analysis**

283 We performed a functional enrichment analysis, focusing on the gene ontologies for biological  
284 process and a tissue expression enrichment (Human gene Atlas, GTEx and Jensen tissue, see methods)  
285 within the list of genes located in SA, SL and SD regions, using EnrichR (Chen *et al.* 2013; Kuleshov *et al.*  
286 2016). Interestingly, genes present in SA regions are enriched in genes associated with embryonic  
287 development (Table 2), both functionally (the growth hormone receptor signaling pathway) and for tissue  
288 expression (developmental tissues, *e.g.* placenta, umbilical artery, amniotic fluid). The genes contributing  
289 most to enrichment signals are the growth hormone genes (GH2, CSH1, CSHL1, CSH2), which are located  
290 in a cluster on chromosome 17, that we will henceforth refer to as the GH locus. Additionally, we find that  
291 there is an enrichment in genes that are down-regulated in the uterus and up-regulated in the adipose  
292 tissue in females. Genes located in SD and SL regions do not show enrichment in sex-specific functions or  
293 development (Table S2 and S3). However, genes located in the mixed regions are expressed preferentially  
294 in sex-specific tissues or are enriched in functions related to embryonic development: genes down-



295 regulated in the fallopian tubes and genes involved in embryonic lethality between implantation and  
296 somite formation (Table S4).

297

### 298 **Case study of two potential sexually-antagonistic regions**

299 We identified 32 SA TD regions containing genes (Table S1). We chose to present in details only two  
300 regions because one is very strongly contributing to the enrichment signal reported above, and the other  
301 is located on the X chromosome, an expected hotspot for the accumulation of SA loci (Rice 1984; Lucotte  
302 *et al.* 2016).

303

#### 304 *i. Region on chromosome 17 (chr17:61779927-61988014, 208kb)*

305 This region contains part of the GH locus: CSH1, CSH2, GH2 and CSHL1 (GH1 missing), which are  
306 responsible for most of the functional and tissue-expression enrichment in genes located in SA regions  
307 (Figure 3, Table 2).

308 The absolute values of the  $\epsilon$ s are comprised between 0.032 and 0.149 (mean 0.107) for males and  
309 0.00 and 0.097 (mean 0.054) for females, with a mean  $\delta |\epsilon_m - \epsilon_f|$  of 0.158 (Figure 3A). Note that the  
310 inversion of the signs of the epsilons in the vicinity of CSHL1 gene is due to a different attribution of  
311 reference and alternative alleles and does not affect our pipeline to detect SA regions. High intersexual  
312  $F_{ST}$  values are observed in this 208kb region, both in children and parents (Figure 3B). However, SNPs  
313 located next to each other can harbor low and high intersexual  $F_{ST}$ , suggesting a complex genomic  
314 architecture. We phased this region and discovered three distinct haplotypes (Figure 3C and S4). The three  
315 haplotypes are almost equally distributed in children (1: 35.8%, 2: 33.8%, 3: 28.2%) and in parents (1:  
316 35.1%, 2: 29.1%, 3: 34.1%). In parents, haplotype 2 is carried by fewer males than expected at random  
317 (41.38 % males,  $p_0 = 50.20$  %, Binomial test p-value = 0.002), while haplotype 3 is carried by an excess of  
318 males (57.35 % males,  $p_0 = 50.20$  %, Binomial test p-value = 0.01). In children, we found an excess of male  
319 with haplotype 1 (48.04 % males,  $p_0 = 39.20$  %, Binomial test p-value = 0.02) while haplotype 2 is still  
320 carried by fewer males than females, although not significantly (31.95 % males,  $p_0 = 39.20$  %, Binomial  
321 test p-value= 0.06). Transmissions of these three haplotypes seem to be sex-antagonistic (Table S5): if a  
322 parent is heterozygous for haplotype 1 and 3, haplotype 1 is more often transmitted to sons (Fisher exact  
323 test, p-value= $3.57 \times 10^{-2}$ ) and haplotype 3 to daughters (Fisher exact test, p-value= $4.79 \times 10^{-2}$ ). Additionally,  
324 if the heterozygous parent has haplotype 1 and haplotype 2 or 3, haplotype 1 is more often transmitted  
325 to sons (Fisher exact test, p-value =  $3.84 \times 10^{-3}$ ) and haplotype 2 or 3 to daughters (Fisher exact test, p-  
326 value= $4.48 \times 10^{-2}$ ). The sample sizes are small, and these p-values do not resist correction for multiple  
327 testing, except for the biased transmission of haplotype 1 to sons compared to 2 or 3 (p-value =  $3.84 \times 10^{-2}$   
328 after Bonferroni correction). These results suggest that haplotype 1 is beneficial for males, and  
329 deleterious for females.

330 This region encompasses 1291 SNPs, and has a length of 208,087bp. The mean number of  
331 differences between genomic regions are 167.66 SNPs for haplotypes 1 and 2, 151.78 SNPs for  
332 haplotypes 1 and 3 and 84.59 SNPs for haplotypes 2 and 3 (Table S6). For such a short region, this suggests  
333 that recombination is rare between the three haplotypes. Indeed, this region is a cold-spot of  
334 recombination (Figure 3D), flanked by two sex-specific hotspots of recombination.

335 This pattern is not due to a mapping artifact, either sex-specific or region-specific (Supplementary  
336 text II). Moreover, while we could not replicate the transmission results in another dataset because we

do not have access to a dataset with enough trios, we were able to replicate the finding of the three haplotypes in other European populations (Supplementary text III).

*ii. Region on the X chromosome (chrX:47753028-47938680, 186kb)*

This region contains the gene SPACA5, the only gene from the SPACA family (5 genes) located on the X chromosome (Figure 4). It encodes a sperm acrosome associated protein; which is directly involved in gamete fusion.

The absolute values of  $\epsilon$ 's are comprised between 0.068 and 0.141 (mean = 0.104) for males and 0.108 and 0.177 for females (mean = 0.138) and the mean  $|\epsilon_m - \epsilon_f|$  is 0.242 (Figure 4A). High intersexual  $F_{ST}$  can be observed along the whole region in offspring, and at the right end of the region for parents (Figure 4B). The same pattern of alternating high and low  $F_{ST}$  for adjacent SNPs, similar to the region of chromosome 17 highlighted above, was observed. We discovered 4 haplotypes, including two in high frequency: haplotype 1 and haplotype 2 with a frequency of 0.516 and 0.441 in parents (0.528 and 0.428 in children), respectively (Figure 4C, S5). Haplotype 3 and 4 have a frequency of 0.013 and 0.025 in parents (0.012 and 0.026 in children), respectively. Transmission of these haplotypes is significantly sex-biased (Table S7): haplotype 1 is more often transmitted to daughters (Fisher exact test p-value =  $2.95 \times 10^{-2}$ ) while haplotype 2 is more often transmitted to sons (Fisher exact test p-value =  $2.05 \times 10^{-2}$ ). Interestingly, when fathers have haplotype 1, mothers are more likely to transmit haplotype 1 to daughters (24 cases against 10 cases of mothers transmitting haplotype 2, Binomial test p-value =  $2.43 \times 10^{-2}$ ). Haplotype 1 and 2 have a lower percentage of divergence in sequence than what we observe for the region on chromosome 17 (Table S8), which can be explained by the occurrence of recombination within the region (Figure 4D).

As above, validation analyses suggest that this pattern is not due to a mapping artifact (Supplementary text II). European populations from the 1000 Genomes project display a similar haplotype structure (Supplementary text III).

## DISCUSSION

We propose a new method to detect sex-of-offspring-specific TD, hereafter referred to as sex-biased TD, using sequencing or genotyping of trio (parent-offspring) datasets to track directly the transmission of alleles in each sex. This offers a way to categorize different types of genomic regions: Sex-Antagonistic (SA), Sex-Limited (SL) and Sex-Differential (SD) TD by providing estimates of the intensity of sex-specific TD. This method circumvents the limitation of previous methods relying solely on intersexual  $F_{ST}$ , by specifically detecting loci undergoing SA TD. Moreover, by using a Local Score method (Fariello *et al.* 2017), we detect genomic windows with an enrichment in low p-values, as expected under TD, and hence reduce the risk to detect false positives as compared to single locus  $F_{ST}$  measurements.

Loci undergoing IASC are expected to experience balancing selection, because different alleles are beneficial in different sexes (Connallon and Clark 2014). It has been proposed to use Tajima's D, a statistic summarizing the site frequency spectrum (essentially capturing the amount of rare versus frequent alleles), in combination with intersexual  $F_{ST}$  to distinguish SA selection from other sex-biased selections (Wright *et al.* 2018). However, signatures of balancing selection are notoriously difficult to detect (Rowe *et al.* 2018). Moreover, in our case, because we only keep SNPs with at least 150 heterozygous trios (75

379 for the X chromosome), we have an ascertainment bias towards SNPs with an elevated Tajima's D,  
380 whether they show a signal of TD or not.

381 The power of the method to detect regions with distortions is strongly dependent on the number  
382 of informative trios. When analyzing the GoNL trios we only have statistical power to test SNPs with  
383 intermediate frequencies. We expect SNP under SA selection to be at intermediate frequencies (Mank  
384 2017) and to exhibit a large difference in sex-specific distortion parameter, as measured by  $(|\epsilon_f - \epsilon_m|)$ , so  
385 SNPs with the strongest amount of SA TD are specifically captured by our method. Although GoNL is one  
386 of the largest trio datasets published to date, the limited number of trios precludes from over-speculating  
387 on specific regions. In this study, we draw conclusions on overall patterns of SA TD, and merely focus on  
388 two regions that seemed the most striking and interesting examples of SA TD.

389 We detected 66 SA TD regions genome-wide, including 32 with genes. We found that regions  
390 undergoing SA TD are enriched for SNPs with high intersexual  $F_{ST}$ , which is expected (Lucotte *et al.* 2016;  
391 Mank 2017). Regions undergoing SL and SD TD also show high intersexual  $F_{ST}$ , but have significantly lower  
392 intersexual  $F_{ST}$  than SA TD regions.

393 We performed a functional and tissue-expression enrichment analysis on the genes located within  
394 the SA region. The enrichment analyses performed in SA regions reveal that these contain genes that are  
395 primarily involved in developmental functions, and expressed in tissues involved in development. The  
396 functional enrichment and expression enrichment were not significant after correction for multiple  
397 testing. However, this result is in concordance with the expectation that SA TD may occur during gamete  
398 fusion and embryo development.

399 We then focused on two SA TD regions: a region on chromosome 17 containing the genes  
400 responsible for most of the genome-wide enrichment in developmental tissues and the unique SA region  
401 containing genes detected on the X chromosome. In both regions, we detected several haplotypes that  
402 are preferentially transmitted to one sex or the other, which is in concordance with the prediction of  
403 theoretical works (Úbeda and Haig 2005; Burt and Trivers 2006; Patten *et al.* 2010; Ubeda *et al.* 2011;  
404 Patten 2014). The chromosome 17 region encompasses the growth hormone locus, notably the GH gene,  
405 which encodes a protein in the placenta that is important for *in utero* development (Oberbauer 2015),  
406 and affects adult traits such as height and bone mineral density (Timasheva *et al.* 2013). Interestingly,  
407 there is evidence for ongoing IASC on human height (Stulp *et al.* 2012). The high sequence divergence  
408 among the three haplotypes is probably due to the lack of recombination in this region. Although sample  
409 sizes are low, a pattern of SA TD of the haplotypes can be detected. However, the p-values for sex  
410 differences in haplotype transmission are nonsignificant.

411 The X chromosome region encompasses the only SPACA gene on this chromosome, which is  
412 expressed in the spermatozoid acrosome, involved in gamete fusion. This is an interesting feature as TD  
413 could happen at gamete fusion. Deeper investigations of the role of this gene and the impact of the  
414 observed genetic polymorphism are warranted.

415 We were able to replicate the finding of the number of haplotypes in European populations of the  
416 1000 Genomes dataset, however, a trio dataset of at least equal sample size should be investigated in the  
417 future to validate the TD pattern detected in the GoNL data. In the near future, we expect more datasets  
418 with pedigrees (trios or extended sibships), on which this method could be used to gain more knowledge  
419 on the architecture of SA TD in the human genome.

420 TD can be due to several non-exclusive mechanisms: after birth and haploid selection, occurring  
421 between gamete formation and fertilization or sexually antagonistic selection on survival occurring

422 between fertilization and birth (during embryonic development). Our method does not allow to  
423 distinguish between these biological mechanisms. One perspective of this study would be to modify the  
424 method to take into account the sex of the parent in TD, which could allow to distinguish between TD  
425 occurring before and after fertilization. Indeed, variation in expression profile of the genes in haploid  
426 sperm among a single ejaculate has been shown to correlate with motility and fertility in humans, which  
427 is consistent with gametic selection happening in humans (Lambard *et al.* 2004).

## 428 429 **CONCLUSION**

430 We provide a new framework to detect loci specifically undergoing sex-antagonistic TD in genomic  
431 datasets. It allows to discriminate between sex-antagonistic, sex-limited and sex-differential TD. This  
432 circumvents limitations of the intersexual  $F_{ST}$  used in previous studies. We detect 32 gene coding regions  
433 undergoing sex-antagonistic TD in a human population from the Netherland and highlight two intriguing  
434 candidate regions. Our method can be applied to any sequencing or genotyping datasets structured in  
435 parents-offspring trios, and constitute therefore an important progress to elucidate the genomic  
436 architecture of intralocus sexual conflicts and their implications in sex dimorphisms evolution. As costs of  
437 sequencing and genotyping are rapidly decreasing, we expect pedigrees datasets to become  
438 commonplace in the future.

## 439 440 441 **ACKNOWLEDGEMENTS**

442 Part of this work was supported by funding from the Danish Council for Independent Research and  
443 the French Ministry for Higher Education and Research. Most of the computing for this project was  
444 performed on the GenomeDK cluster. We would like to thank GenomeDK and Aarhus University for  
445 providing computational resources and support that contributed to these research results. This study  
446 makes use of data generated by the Genome of the Netherlands Project. A full list of the investigators is  
447 available from [www.nlgenome.nl](http://www.nlgenome.nl). Funding for the GoNL project was provided by the Netherlands  
448 Organization for Scientific Research under award number 184021007, dated July 9, 2009 and made  
449 available as a Rainbow Project of the Biobanking and Biomolecular Research Infrastructure Netherlands  
450 (BBMRI-NL). The sequencing was carried out in collaboration with the Beijing Institute for Genomics (BGI).

## 451 452 **AUTHOR CONTRIBUTIONS**

453 EL, BT and TB conceived and designed the study, and acquired funding. This work was supervised  
454 by TB and BT. CA and BT formalized and CA coded the likelihood method designed by TB and EL. EL and  
455 RL curated and analysed the data. Additional analyses on recombination were performed by CB. EL  
456 drafted the initial version of the manuscript and BT, RL, TB and CA contributed to later versions of the  
457 manuscript. The Genome of the Netherland Consortium provided the data.

## 458 459 **DATA ACCESSIBILITY**

460 This project was approved by the GoNL Data Access Committee (application nr 2014053).

## 461 462 **REFERENCES**

- 463 Aiken C. E., and S. E. Ozanne, 2013 Sex differences in developmental programming models.  
464 *Reproduction* 145: R1-13. <https://doi.org/10.1530/REP-11-0489>  
465 Benagiano G., M. Farris, and G. Grudzinskas, 2010 Fate of fertilized human oocytes. *Reprod. Biomed.*  
466 *Online* 21: 732–741.

- 467 Bherer C., C. L. Campbell, and A. Auton, 2017 Refined genetic maps reveal sexual dimorphism in human  
468 meiotic recombination at multiple scales. *Nat. Commun.* 8. <https://doi.org/10.1038/ncomms14994>
- 469 Boomsma D. I., C. Wijmenga, E. P. Slagboom, M. a Swertz, L. C. Karszen, *et al.*, 2014 The Genome of the  
470 Netherlands: design, and project goals. *Eur. J. Hum. Genet.* 22: 221–7.  
471 <https://doi.org/10.1038/ejhg.2013.118>
- 472 Burt A., and R. L. Trivers, 2006 *Genes in Conflict: The Biology of Selfish Genetic Elements*. Belknap Press  
473 of Harvard University Press, Cambridge, MA.
- 474 Chen E. Y., C. M. Tan, Y. Kou, Q. Duan, Z. Wang, *et al.*, 2013 Enrichr: interactive and collaborative HTML5  
475 gene list enrichment analysis tool. *BMC Bioinformatics* 14: 128. [https://doi.org/10.1186/1471-](https://doi.org/10.1186/1471-2105-14-128)  
476 [2105-14-128](https://doi.org/10.1186/1471-2105-14-128)
- 477 Cheng C., and M. Kirkpatrick, 2016 Sex-Specific Selection and Sex-Biased Gene Expression in Humans  
478 and Flies. *PLoS Genet.* 12: 1–18. <https://doi.org/10.1371/journal.pgen.1006170>
- 479 Chippindale A. K., J. R. Gibson, and W. R. Rice, 2001 Negative genetic correlation for adult fitness  
480 between sexes reveals ontogenetic conflict in *Drosophila*. *Proc. Natl. Acad. Sci. U. S. A.* 98: 1671–  
481 1675. <https://doi.org/10.1073/pnas.041378098>
- 482 Connallon T., and A. G. Clark, 2014 Balancing Selection in Species with Separate Sexes: Insights from  
483 Fisher’s Geometric Model. *Genetics* 197: 991–1006. <https://doi.org/10.1534/genetics.114.165605>
- 484 Fariello M. I., S. Boitard, S. Mercier, D. Robelin, T. Faraut, *et al.*, 2017 Accounting for linkage  
485 disequilibrium in genome scans for selection without individual genotypes: The local score  
486 approach. *Mol. Ecol.* 26: 3700–3714. <https://doi.org/10.1111/mec.14141>
- 487 Flanagan S. P., and A. G. Jones, 2017 Genome-wide selection components analysis in a fish with male  
488 pregnancy. *Evolution (N. Y.)*. 71: 1096–1105. <https://doi.org/10.1111/evo.13173>
- 489 Frazer K. A., D. G. Ballinger, D. R. Cox, D. A. Hinds, L. L. Stuve, *et al.*, 2007 A second generation human  
490 haplotype map of over 3.1 million SNPs. *Nature* 449: 851–861.  
491 <https://doi.org/10.1038/nature06258>
- 492 Hennig C., 2019 fpc: Flexible Procedures for Clustering.
- 493 Kasimatis K. R., T. C. Nelson, and P. C. Phillips, 2017 Genomic Signatures of Sexual Conflict. *J. Hered.* 108:  
494 780–790. <https://doi.org/10.1093/jhered/esx080>
- 495 Kasimatis K. R., P. L. Ralph, and P. C. Phillips, 2019 Limits to genomic divergence under sexually  
496 antagonistic selection. *G3 Genes, Genomes, Genet.* 9: 3813–3824.  
497 <https://doi.org/10.1534/g3.119.400711>
- 498 Kuleshov M. V., M. R. Jones, A. D. Rouillard, N. F. Fernandez, Q. Duan, *et al.*, 2016 Enrichr: a  
499 comprehensive gene set enrichment analysis web server 2016 update. *Nucleic Acids Res.* 44: W90–  
500 W97. <https://doi.org/10.1093/nar/gkw377>
- 501 Lambard S., I. Galeraud-Denis, G. Martin, R. Levy, A. Chocat, *et al.*, 2004 Analysis and significance of  
502 mRNA in human ejaculated sperm from normozoospermic donors: Relationship to sperm motility  
503 and capacitation. *Mol. Hum. Reprod.* 10: 535–541. <https://doi.org/10.1093/molehr/gah064>
- 504 Lucotte E. A., R. Laurent, E. Heyer, L. Segurel, and B. Toupance, 2016 Detection of Allelic Frequency  
505 Differences between the Sexes in Humans : A Signature of Sexually Antagonistic Selection. 8: 1489–  
506 1500. <https://doi.org/10.1093/gbe/evw090>
- 507 Mank J. E., 2017 Population genetics of sexual conflict in the genomic era. *Nat. Rev. Genet.* 18: 721–730.  
508 <https://doi.org/10.1038/nrg.2017.83>
- 509 O’Connell J., D. Gurdasani, O. Delaneau, N. Pirastu, S. Ulivi, *et al.*, 2014 A General Approach for  
510 Haplotype Phasing across the Full Spectrum of Relatedness. *PLoS Genet.* 10.  
511 <https://doi.org/10.1371/journal.pgen.1004234>
- 512 Oberbauer A. M., 2015 Developmental programming: The role of growth hormone. *J. Anim. Sci.*  
513 *Biotechnol.* 6: 1–7. <https://doi.org/10.1186/s40104-015-0001-8>
- 514 Parker G. A., R. R. Baker, and V. G. Smith, 1972 The origin and evolution of gamete dimorphism and the  
515 male-female phenomenon. *J. Theor. Biol.* 36: 529–553. [13](https://doi.org/10.1016/0022-</a></p></div><div data-bbox=)

- 516 5193(72)90007-0
- 517 Parsch J., and H. Ellegren, 2013 The evolutionary causes and consequences of sex-biased gene  
518 expression. *Nat. Rev. Genet.* 14: 83–87. <https://doi.org/10.1038/nrg3376>
- 519 Patten M. M., D. Haig, and F. Úbeda, 2010 Fitness variation due to sexual antagonism and linkage  
520 disequilibrium. *Evolution (N. Y.)*. 64: 3638–3642. <https://doi.org/10.1111/j.1558-5646.2010.01100.x>
- 521 Patten M. M., 2014 Meiotic drive influences the outcome of sexually antagonistic selection at a linked  
522 locus. *J. Evol. Biol.* 27: 2360–2370. <https://doi.org/10.1111/jeb.12493>
- 523 Rice W. R., 1984 Sex chromosomes and the evolution of sexual dimorphism. *Evolution (N. Y.)*. 38: 735–  
524 742.
- 525 Rowe L., S. F. Chenoweth, and A. F. Agrawal, 2018 The Genomics of Sexual Conflict. *Am. Nat.* 192: 274–  
526 286. <https://doi.org/10.1086/698198>
- 527 Spielman R. S., R. E. McGinnis, and W. J. Ewens, 1993 Transmission test for linkage disequilibrium: the  
528 insulin gene region and insulin-dependent diabetes mellitus (IDDM). *Am. J. Hum. Genet.* 52: 506–  
529 516.
- 530 Stulp G., B. Kuijper, A. P. Buunk, T. V Pollet, and S. Verhulst, 2012 Intralocus sexual conflict over human  
531 height. *Biol. Lett.* 8: 976–978. <https://doi.org/10.1098/rsbl.2012.0590>
- 532 The Genome of the Netherlands Consortium, 2014 Whole-genome sequence variation, population  
533 structure and demographic history of the Dutch population. *Nat. Genet.* 46: 818–828.  
534 <https://doi.org/10.1038/ng.3021>
- 535 Timasheva Y., M. Putku, R. Kivi, V. Kožich, J. Männik, *et al.*, 2013 Developmental programming of  
536 growth: Genetic variant in GH2 gene encoding placental growth hormone contributes to adult  
537 height determination. *Placenta* 34: 995–1001. <https://doi.org/10.1016/j.placenta.2013.08.012>
- 538 Úbeda F., D. Haig, and M. M. Patten, 2011 Stable linkage disequilibrium owing to sexual antagonism.  
539 *Proc. R. Soc. B* 278: 855–62. <https://doi.org/10.1098/rspb.2010.1201>
- 540 Úbeda F., and D. Haig, 2005 On the evolutionary stability of Mendelian segregation. *Genetics* 170: 1345–  
541 1357. <https://doi.org/10.1534/genetics.104.036889>
- 542 Ucisik-Akkaya E., C. F. Davis, T. N. Do, B. A. Morrison, S. M. Stemmer, *et al.*, 2010 Examination of genetic  
543 polymorphisms in newborns for signatures of sex-specific prenatal selection. *Mol. Hum. Reprod.*  
544 16: 770–777. <https://doi.org/10.1093/molehr/gaq047>
- 545 Weir B. S., and C. C. Cockerham, 1984 Estimating F-statistics for the analysis of population structure.  
546 *Evolution (N. Y.)*. 38: 1358–1370.
- 547 Wright A. E., M. Fumagalli, C. R. Cooney, N. I. Bloch, F. G. Vieira, *et al.*, 2018 Male-biased gene  
548 expression resolves sexual conflict through the evolution of sex-specific genetic architecture. *Evol.*  
549 *Lett.* 1–10. <https://doi.org/10.1002/evl3.39>

550

551

552

553

## FIGURES

**Figure 1- Overview of the likelihood method.** **A-** Probability of transmission tables for each model, for AAxAB parents and ABxAB parents. Model 0 is Mendelian transmission, Model 1 is standard transmission distortion, with a unique distortion parameter  $\epsilon$ , and Model 2 is sex-specific transmission distortion with sex-specific distortion parameters:  $\epsilon_m$  for males and  $\epsilon_f$  for females. **B-** Schematics of the inferred sex-specific distortion parameters in sex-antagonistic, sex-differential or sex-limited regions. **C-** Power simulations at a 0.05 significance level to detect sex-specific TD in case of sex-antagonistic, sex-differential or sex-limited TD, as a function of the number of informative trios and depending on the absolute value of the differences between  $\epsilon_m$  and  $\epsilon_f$ . **D-** Power simulation at a 0.05 significance level to detect different value of a non-sex-specific  $\epsilon$  for different values of  $\epsilon$  and number of informative trios.

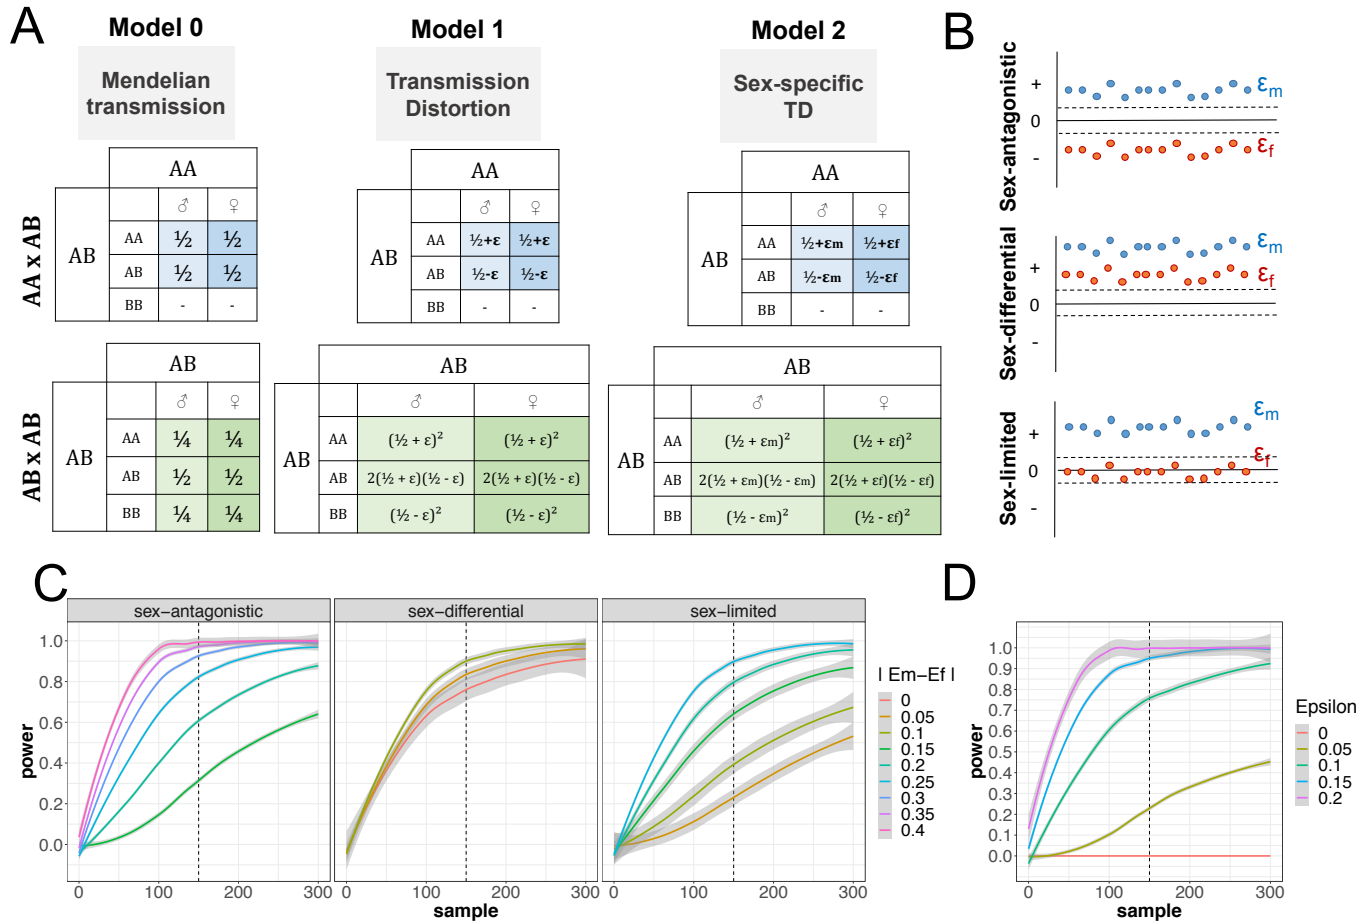

565 **Figure 2- Description of the Sex Antagonistic (Red), Sex Differential (green) and Sex Limited (blue) signal.**  
 566 **A-** Genomic localization of the TD regions. The dark grey rectangles represent centromeres. **B-**  
 567 **Classification of the epsilons-** example of chromosome 1. Each point represents one SNP, for which an  
 568 epsilon m ( $\epsilon_m$ ) and epsilon f ( $\epsilon_f$ ) were estimated. Grey points represent SNP with a non-significant p-value.  
 569 **C- Classification of the regions** detected using the Local score method. Each point represents a region,  
 570 for which a mean value of the absolute  $\epsilon_m$  and  $\epsilon_f$  were calculated. The two stars highlight the two regions  
 571 we analyze further. **D- Number of regions per quantile of recombination rate** (cM/Mb). Each bar  
 572 represents one type of region. Stars represent the level of significance as measured by a binomial test  
 573 ( $H_0$ : 25% of the regions are in each quantile of recombination rate, \*\*: p-value <0.1, \*\*\*: p-value <0.01).

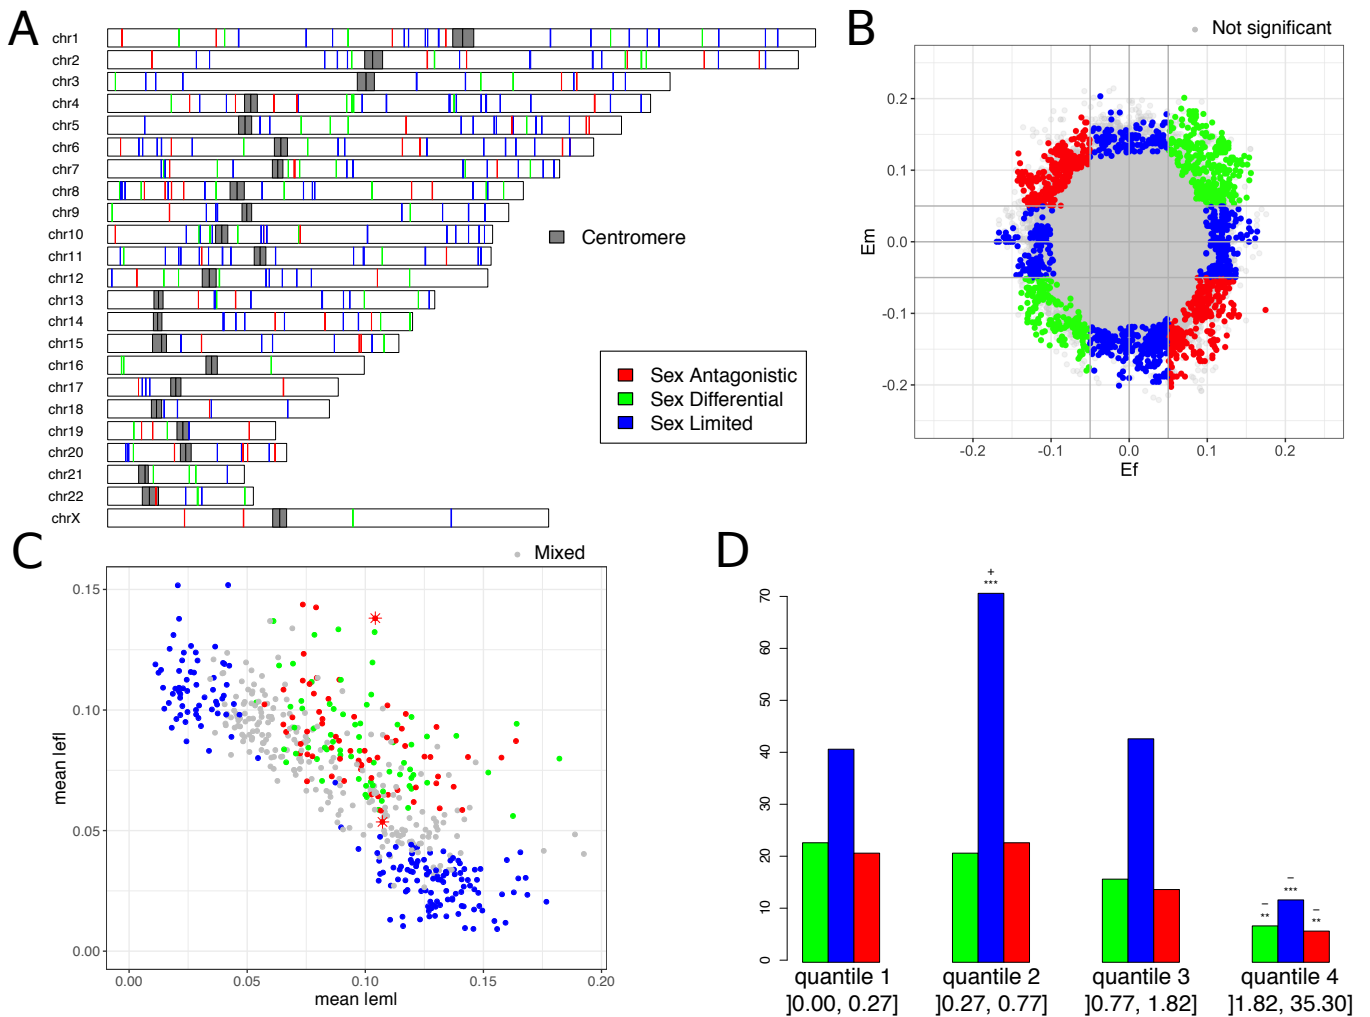

574



575  
576  
577  
578  
579  
580  
581  
582  
583  
584

**Figure 3- Sexually antagonistic TD region chr17:61779927-61988014 (208 kb)** **A-** Sex-specific distortion coefficients epsilon ( $\epsilon_m$  in red and  $\epsilon_f$  in blue). Epsilon differing significantly from zero (LRT p-values lower than 0.05) are in lighter colors. **B-** Intersexual  $F_{ST}$  in parents (red) and offspring (blue) for the extended region, significant p-values (as calculated by Fisher exact test,  $p < 0.05$ ) are in lighter color. **C-** Multi Dimensional Scaling on the genetic distance matrix between all individuals, clustered using a density-based clustering algorithm. Each color denotes a cluster. **D-** The female (red) and male (blue) estimates of recombination rates from our combined genetic maps, as well as the sex-averaged recombination rates (black) from the HapMap linkage genetic map. Horizontal grey lines represent the position of the region of interest.

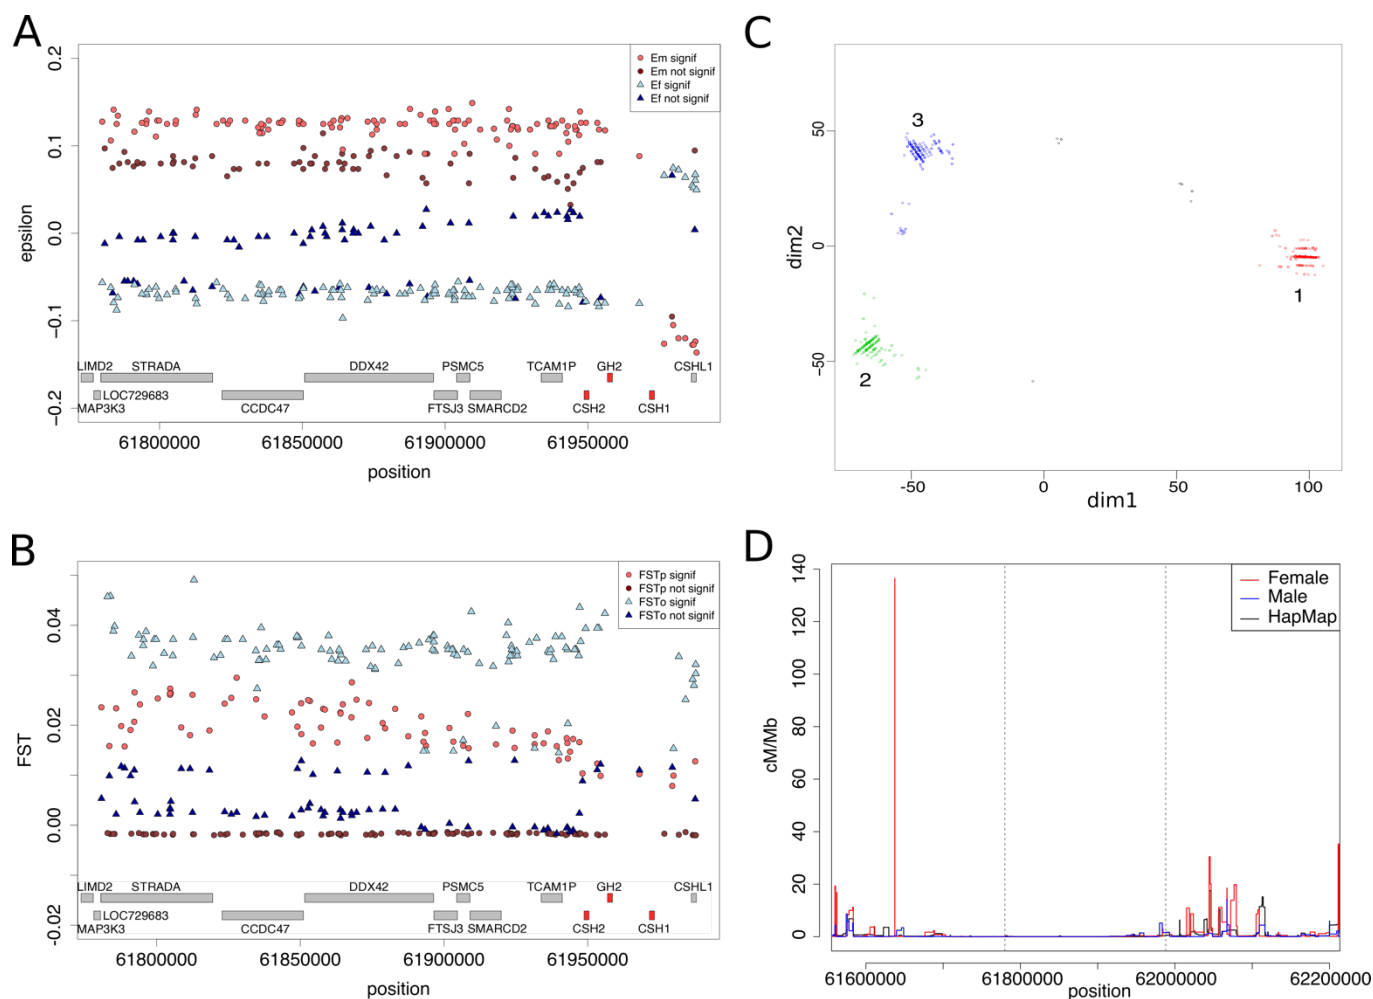

585

586 **Figure 4- Sexually antagonistic SoO specific TD region chrX:47753028-47938680 (186 kb)** **A-** Sex-specific  
587 epsilon (Em in red and Ef in blue). Epsilon with LRT p-values lower than 0.05 are in lighter colors. **B-**  
588 intersexual  $F_{ST}$  in parents (red) and offspring (blue) for the extended region, significant p-values (as  
589 calculated by Fisher exact test,  $p < 0.05$ ) are in lighter color. **C-** Multi Dimensional Scaling on the genetic  
590 distance matrix between all individuals, clustered using a density-based clustering algorithm. **D-** The  
591 female (red) estimates of recombination rates from our combined genetic maps. Horizontal grey lines  
592 represent the position of the region of interest.

593

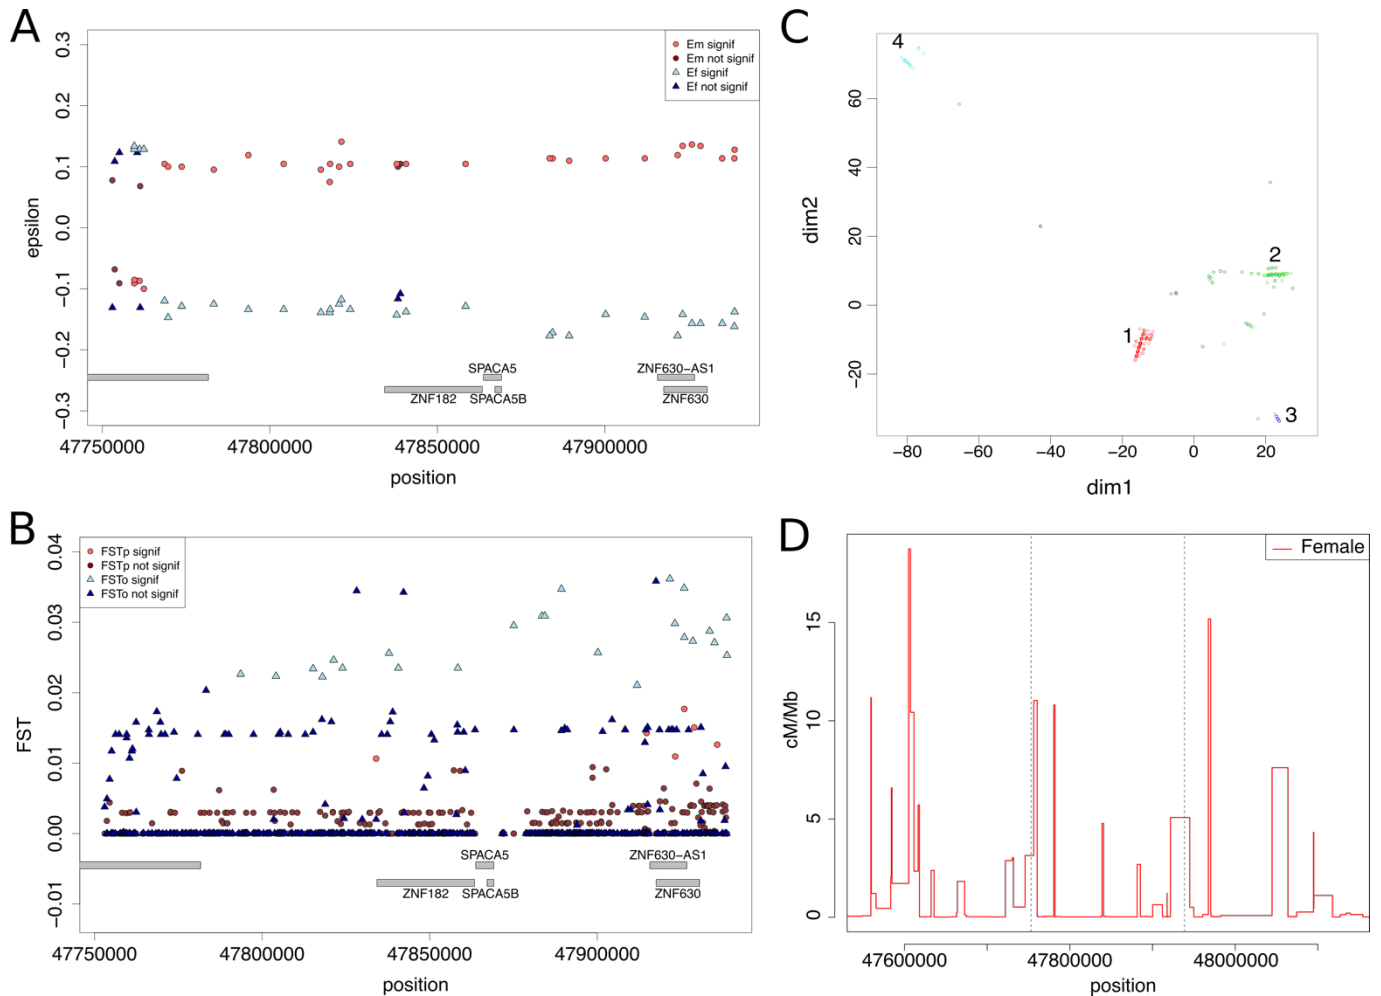

594

595

## TABLES

596

597

598

**Table 1-** Summary table describing the sex-of-offspring specific TD regions detected

| Type             | N region | With genes | Median Length | Number of SNPs |     |      |
|------------------|----------|------------|---------------|----------------|-----|------|
|                  |          |            |               | Median         | Min | Max  |
| Sex Antagonist   | 66       | 32         | 72005         | 66             | 14  | 374  |
| Sex Limited      | 168      | 70         | 68578.5       | 77             | 13  | 720  |
| Sex Differential | 68       | 33         | 74368         | 60.5           | 18  | 238  |
| Mixed            | 230      | 121        | 98567         | 92.5           | 13  | 1111 |

599

500

501

502

503

504

505

506

**Table 2-** Summary of the enrichment found for the list of genes present in SA TD regions. For GO Biological Process and Human Gene Atlas, the enrichment is based on biological functions. For both GTEX and Jensen Tissue databases, the enrichment is based on which tissues the genes are expressed in.

| Database                                   | Term                                                      | Overlap | P-value  | Adjusted P-value | Z-score | Combined Score | Genes                                                             |
|--------------------------------------------|-----------------------------------------------------------|---------|----------|------------------|---------|----------------|-------------------------------------------------------------------|
| <b>GO Biological Process</b>               | growth hormone receptor signaling pathway (GO:0060396)    | 3/21    | 1.03E-04 | 5.65E-02         | -2.15   | 19.77          | GH2;CSH1;CSHL1                                                    |
| <b>Human Gene Atlas</b>                    | Placenta                                                  | 5/405   | 3.32E-02 | 9.79E-01         | -1.66   | 5.65           | GH2;CSH2;CSH1;OLR1;CSHL1                                          |
| <b>GTEX Tissue Expression Profile down</b> | GTEX-QCQG-1326-SM-48U24_uterus_female_50-59_years         | 4/261   | 2.82E-02 | 1.00E+00         | -1.93   | 6.88           | EPHA10;PPP1R1C;SOD2;ADRA1A                                        |
| <b>GTEX Tissue Expression Profile up</b>   | GTEX-OXRO-0226-SM-3LK6F_adipose tissue_female_60-69_years | 11/1039 | 5.79E-03 | 1.00E+00         | -1.84   | 9.48           | BIN3;WTAP;SLC6A16;STRADA;NTRK3;TIMM9;TCP1;DDX42;SOD2;SORBS3;CCAR2 |
| <b>Jensen Tissues</b>                      | Umbilical_artery                                          | 2/8     | 5.27E-04 | 8.04E-02         | -2.83   | 21.39          | CSH2;CSH1                                                         |
|                                            | Endometrial_gland                                         | 2/10    | 8.42E-04 | 8.04E-02         | -3.55   | 25.15          | CSH2;CSH1                                                         |
|                                            | Trophoblast_cell_line                                     | 2/11    | 1.03E-03 | 8.04E-02         | -2.99   | 20.61          | CSH2;CSH1                                                         |
|                                            | Amniotic_fluid                                            | 3/52    | 1.56E-03 | 9.15E-02         | -3.14   | 20.31          | CSH2;CSH1;THY1                                                    |
